# Supplementary material
Source: PubMed Central journal article supplement (PMC6751525)
Supplement: ac9b02637_si_001.pdf [file ac9b02637_si_001.pdf]

Supporting information for:  
Cluster-wise peak detection and filtering  
based on spatial distribution to efficiently  
mine mass spectrometry imaging data

Jonatan O. Eriksson,<sup>†</sup> Melinda Rezeli,<sup>†</sup> Max Hefner,<sup>†</sup> Gyorgy Marko-Varga,<sup>†</sup> and  
Peter Horvatovich<sup>\*,†,‡</sup>

<sup>†</sup>*Lund University, Department of Biomedical Engineering, Lund*

<sup>‡</sup>*University of Groningen, Department of Analytical Biochemistry, Groningen Research  
Institute of Pharmacy, Antonius Deusinglaan 1, 9713 AV, Groningen, the Netherlands*

E-mail: [p.l.horvatovich@rug.nl](mailto:p.l.horvatovich@rug.nl)

# Peak picking algorithm

1. For each spectrum in the data set append the  $m/z$ -values of the centroids of its peaks to a global  $m/z$  list applying only a very gentle threshold on minimum peak intensity. This will result in a master  $m/z$  list  $mz_{all}$  containing many million  $mz$ -values. Sort  $mz_{all}$ .
2. Identify  $m/z$ -clusters in  $mz_{all}$  using a a one-directional graph approach where a  $m/z$ -value is connected to the next consecutive value if there is a non-zero value within a distance,  $d_c$ , proportional to the theoretical peak width of the instrument (this threshold varies across the  $m/z$ -range according to the theoretical peak width of the mass analyzer).
3. Investigate the distribution of the peak  $m/z$  values within each cluster with Kernel Density Estimation (KDE). The kernel bandwidth is optimized (using MATLAB's *kdensity* function) for each cluster.
4. Identify local maxima on the KDE curve and add the corresponding  $m/z$  values to the data set peak list,  $mz_{ref}$ : given the list of local maxima,  $p_{kde}$ , with all local maxima on the KDE curve: (i) take the highest maximum (the most dense signal)  $mz_{max}$  and add it to  $mz_{ref}$  (ii) remove  $p_{max}$  and all other maxima within distance  $\Delta m/z$  from  $mz_{max}$  from  $p_{kde}$ , repeat (i) - (ii) until  $p_{kde}$  is empty or  $mz_{max}$  is below a threshold proportional to the initial  $mz_{max}$ , .
5. Align each spectrum to the reference spectrum,  $m_{ref}$  to generate the ion images, here we use a simple nearest neighbor alignment method but other methods can be used as well. Given the  $i$ -th centroided spectrum,  $s_i$ , and aligned spectrum,  $sa_i$ , for each  $mz_j$  in  $mz_{ref}$  find the closest  $m/z$  value in  $s_i$ , if this value is within a maximum distance set  $sa_{i(j)}$  to its corresponding intensity value, if not, set  $sa_{i(j)}$  to zero.
6. Remove ion images with too few non-zero pixels.

7. Compute scores based on spatial characteristics for the remaining ion images, i.e. SC from Palmer et al. or VE from Fonville et al. Remove ion image whose scores are below user defined thresholds.

# Mass drift

Table S1: Mass drift

| Compound    | Mass    | Mass Error NAME [ppm] | Mass Error Cardinal [ppm] |
|-------------|---------|-----------------------|---------------------------|
| Ipratropium | 332.223 | 4.29                  | 28.87                     |
| Vatalanib   | 347.107 | 2.16                  | 194.88                    |
| Erlotinib   | 394.177 | 3.39                  | 164.73                    |
| Sunitinib   | 399.220 | 2.40                  | NA                        |
| Pazopanib   | 438.171 | 2.68                  | 26.06                     |
| Gefitinib   | 447.160 | 3.73                  | NA                        |
| Sorafenib   | 465.094 | 3.36                  | 4.23                      |
| Dasatinib   | 488.164 | 2.23                  | 14.06                     |
| Imatinib    | 494.267 | 1.61                  | NA                        |
| Dabrafenib  | 520.109 | 2.30                  | 198.85                    |
| Lapatinib   | 581.143 | 1.00                  | 40.18                     |
| Trametinib  | 616.086 | 2.03                  | NA                        |

## Spiked rat liver section

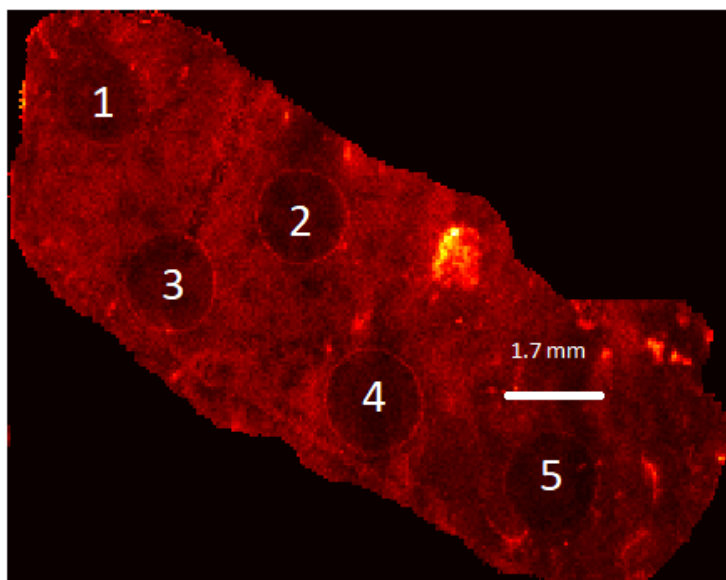

Figure S1: A 181 x 247 pixel ion image the rat liver section at  $m/z = 186.0750$ . The five spiked-in spots are visible against the background signal from the tissue.

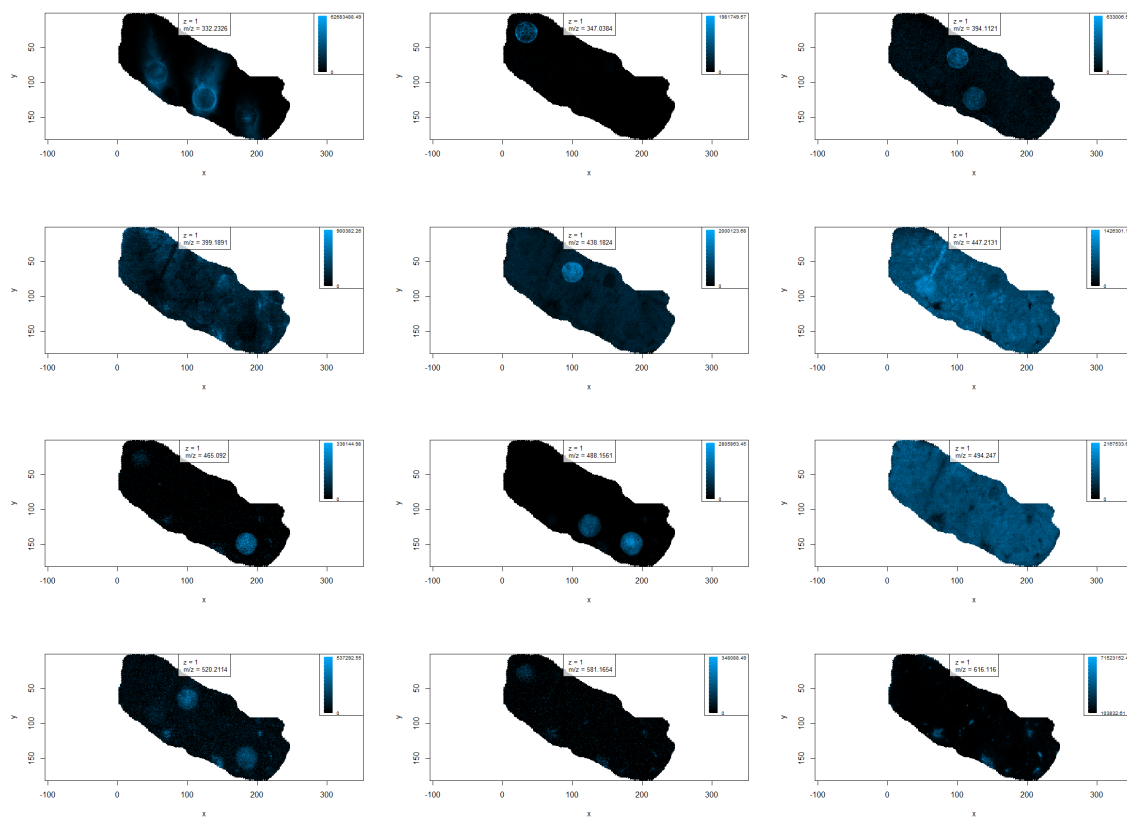

Figure S2: Images of spiked-in drug compounds generated with Cardinal.

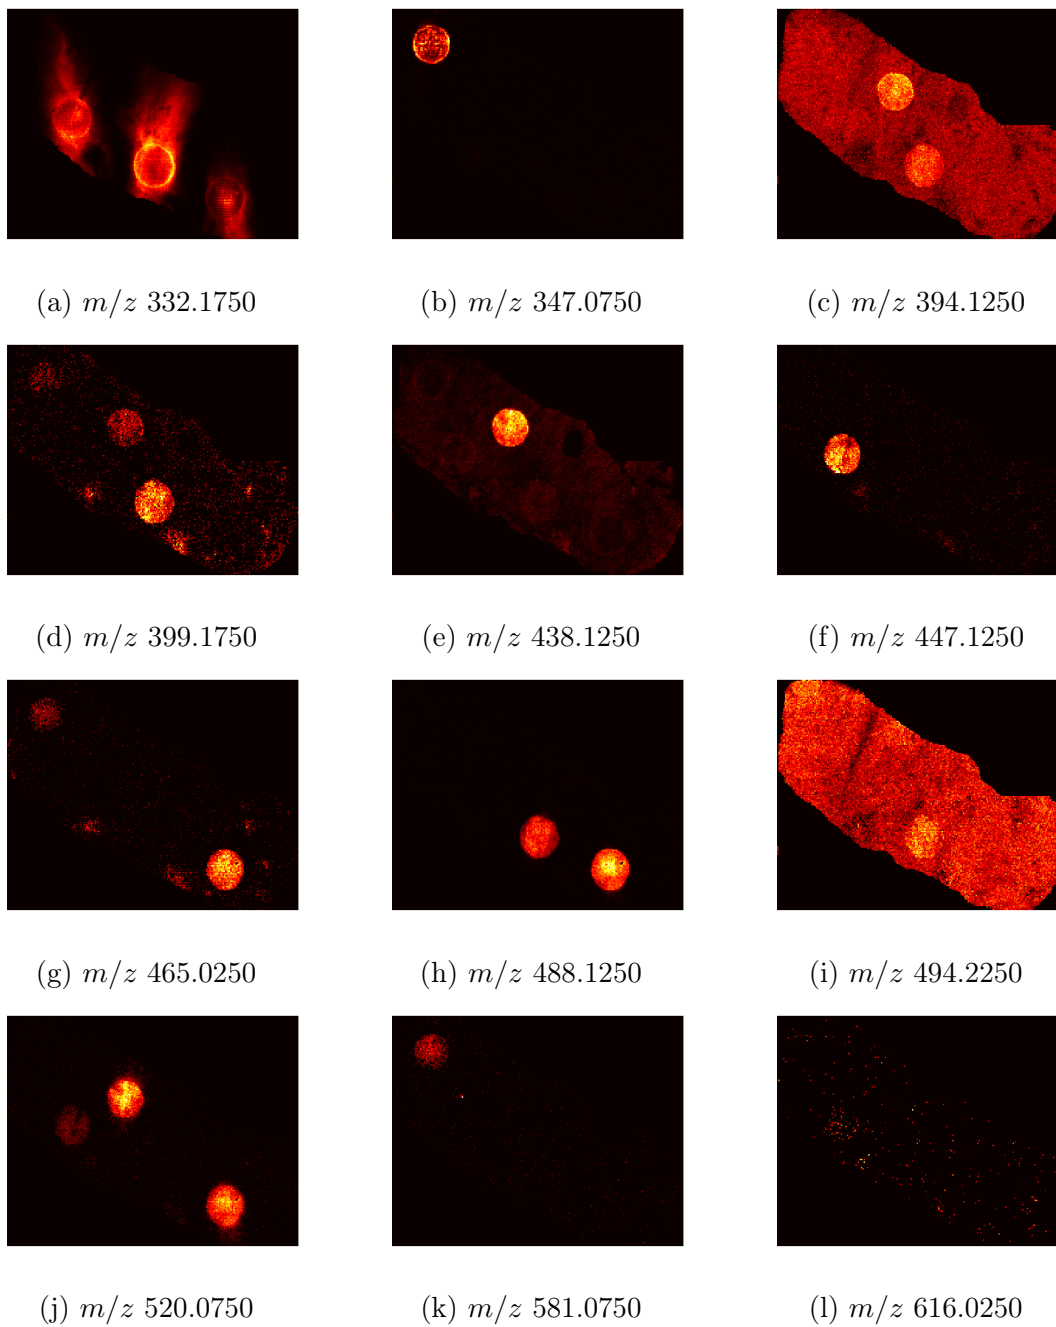

Figure S3: Images of spiked-in drug compounds generated by slicing.

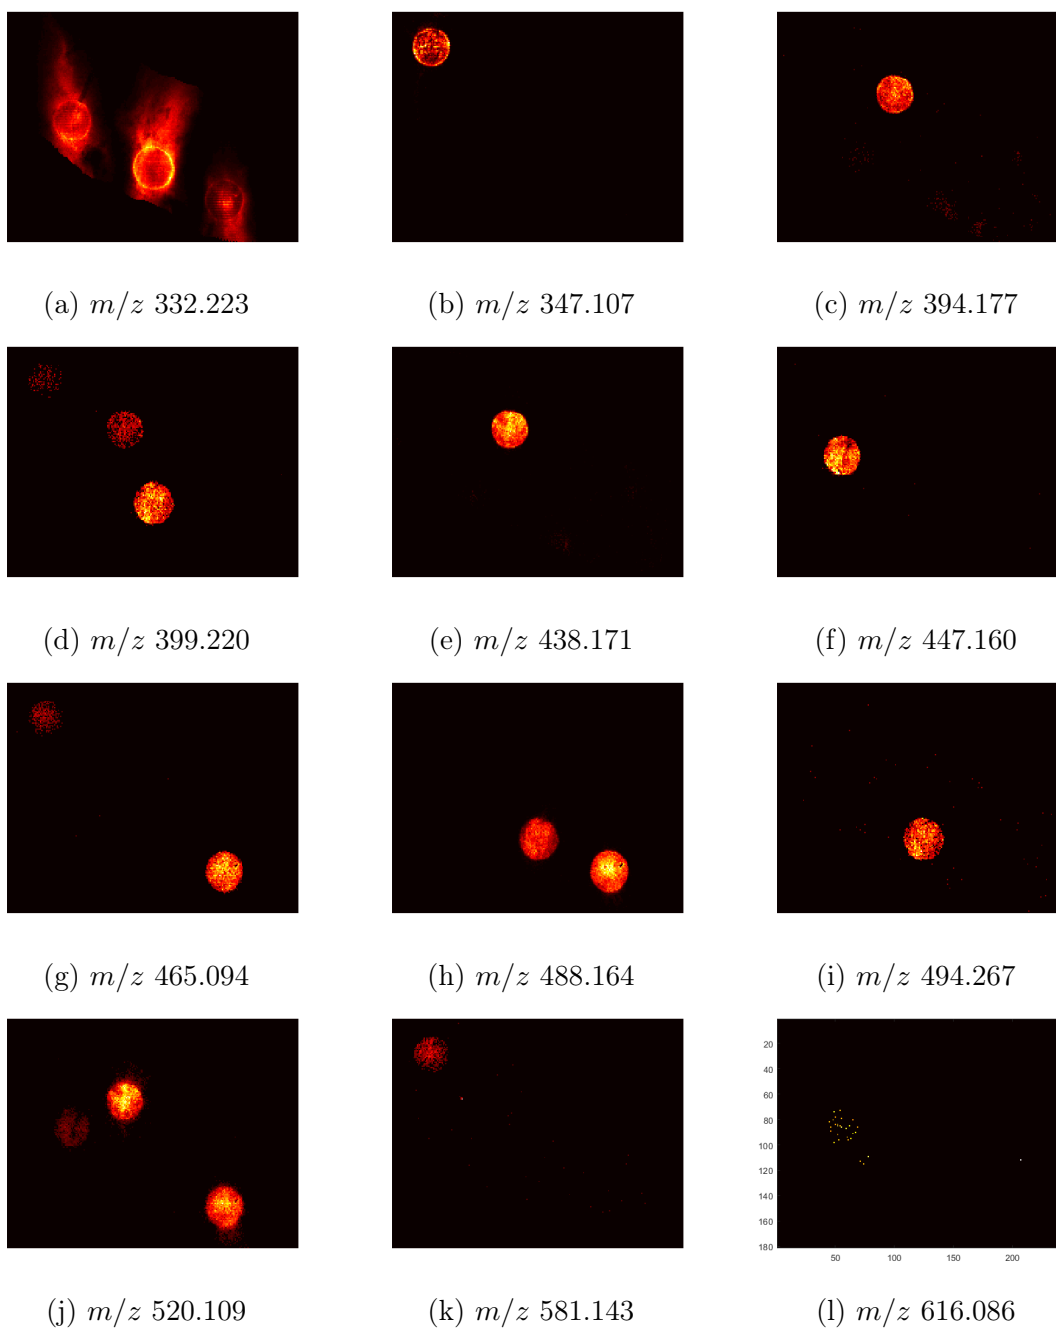

Figure S4: Images of the spiked-in drug compounds generated using KDE cluster-wise peak picking.



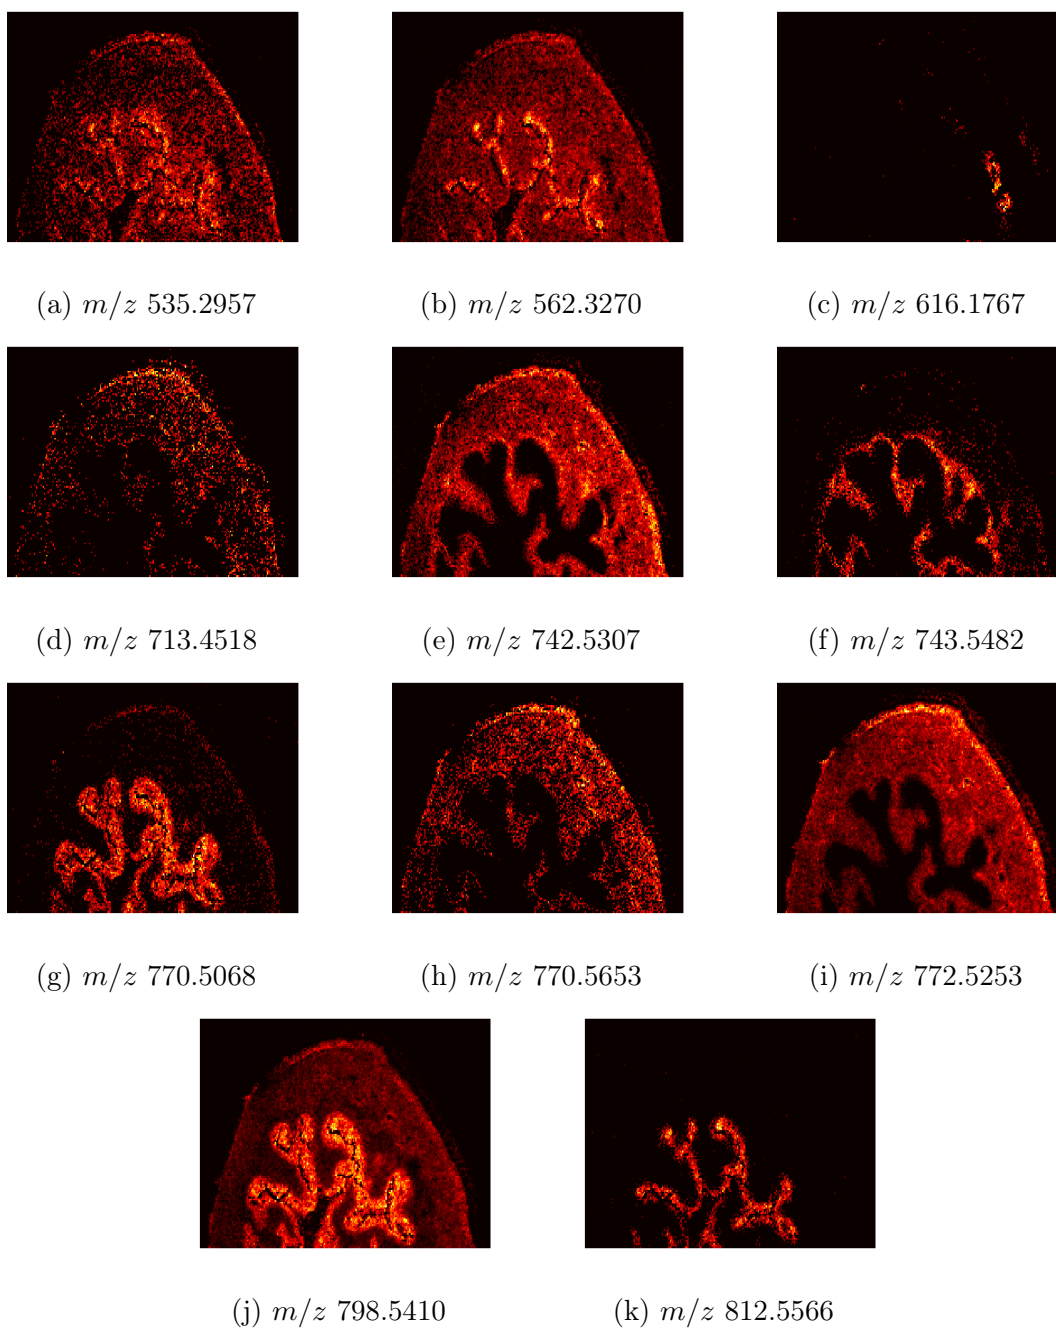

Figure S5: Ion-images of known compounds in the mouse bladder data set KDE cluster-wise peak picking.

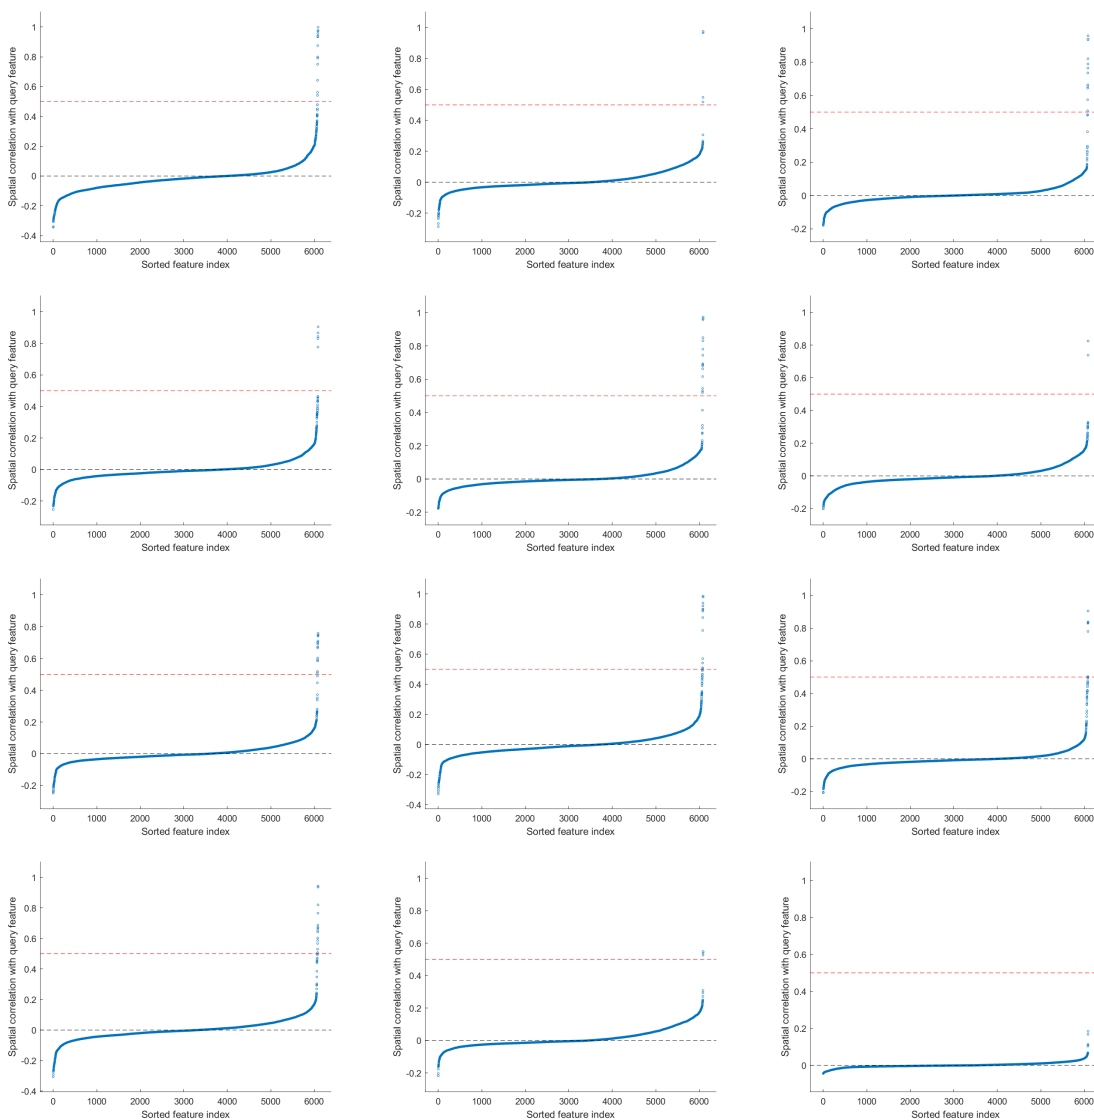

Figure S6: Correlation queries for spiked-in drug compounds using the images generated by our cluster-wise peak detection.

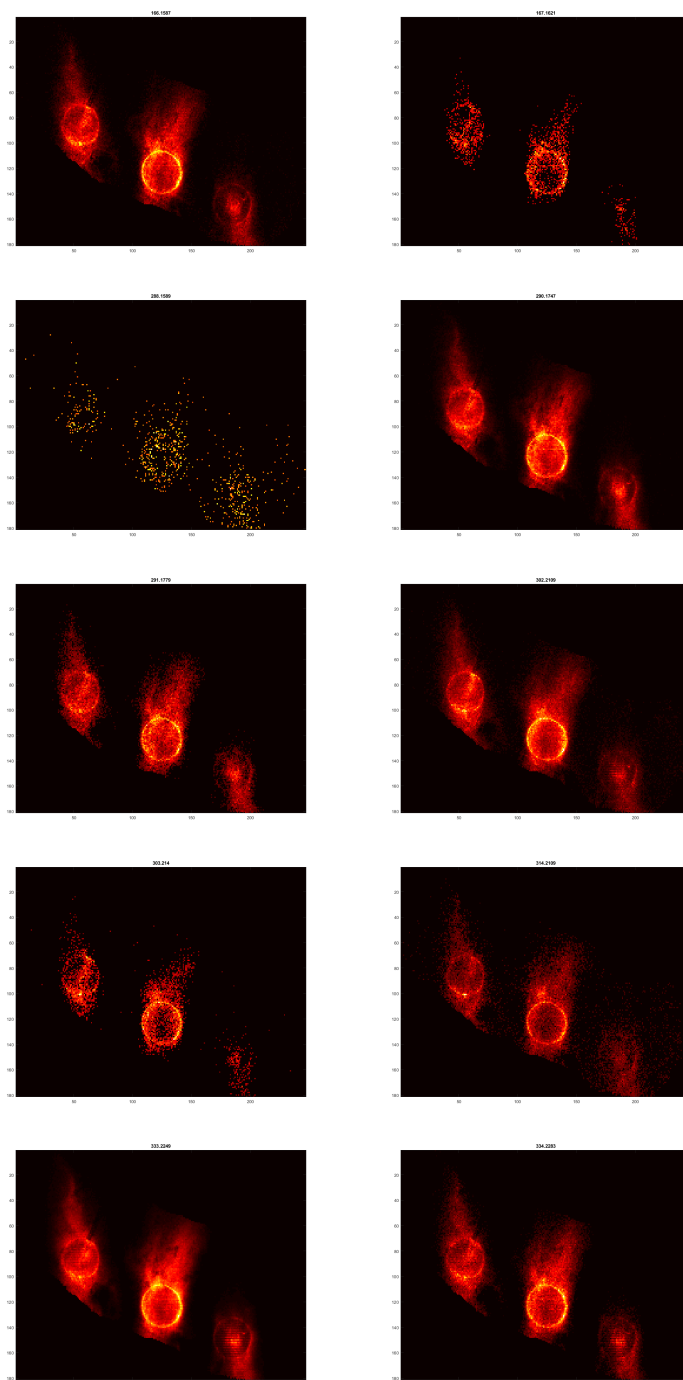

Figure S7: Fragments and isotopes for  $m/z = 332.223$ .

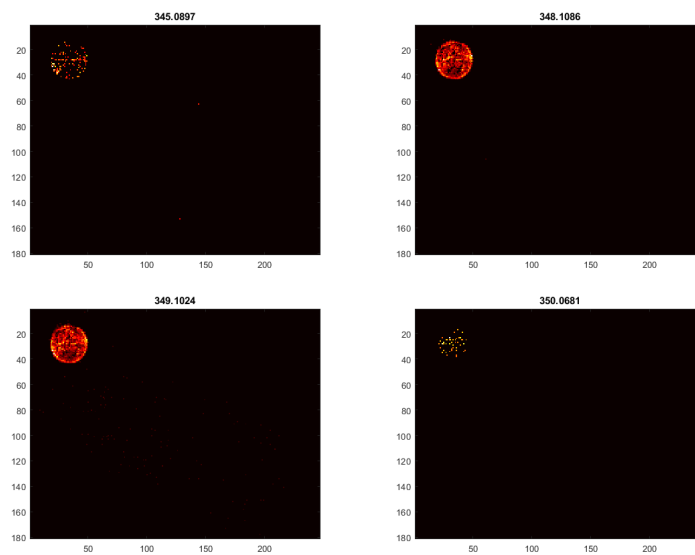

Figure S8: Fragments and isotopes for  $m/z = 347.107$ .

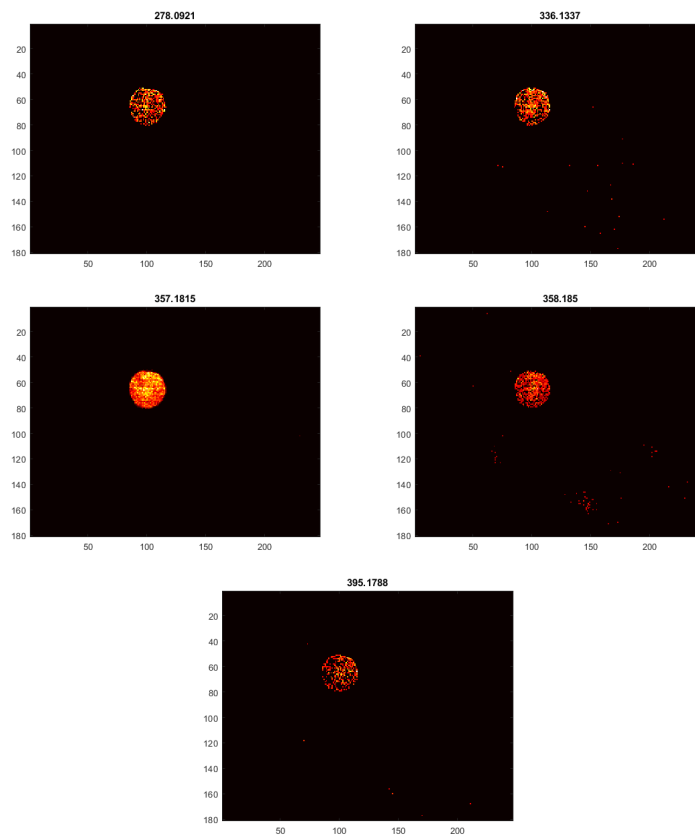

Figure S9: Fragments and isotopes for  $m/z = 394.107$ .

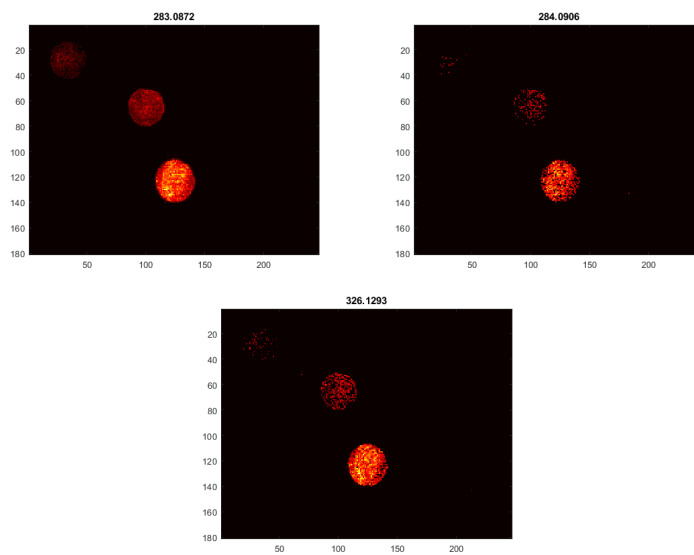

Figure S10: Fragments and isotopes for  $m/z = 399.107$ .

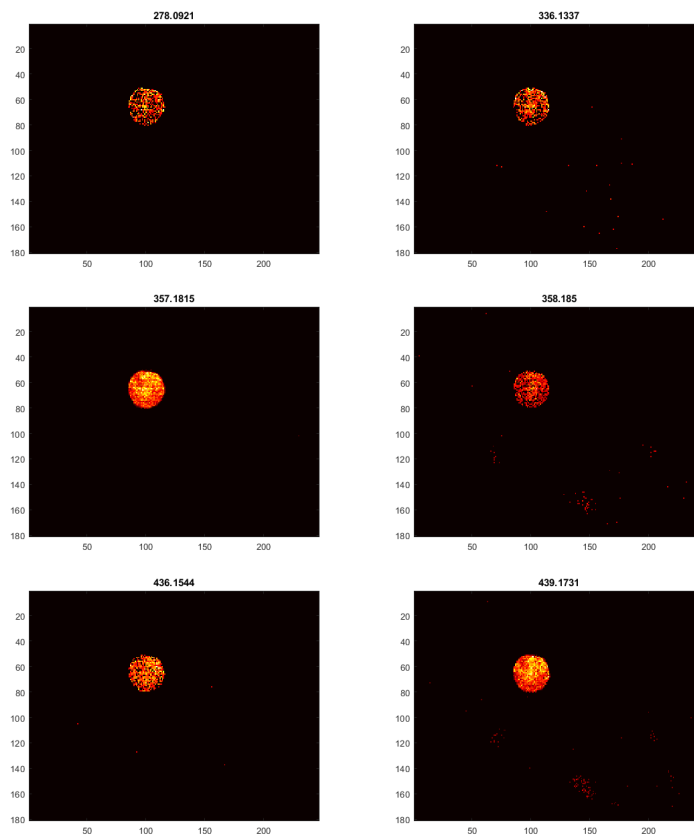

Figure S11: Fragments and isotopes for  $m/z = 438.107$ .

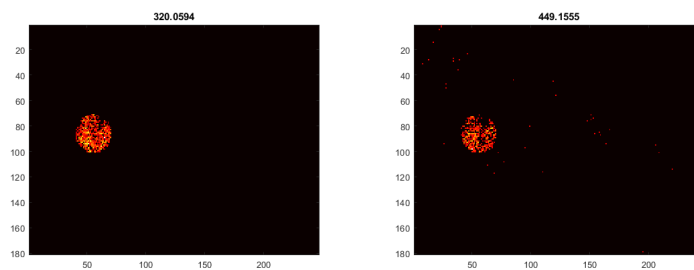

Figure S12: Fragments and isotopes for  $m/z = 447.107$ .

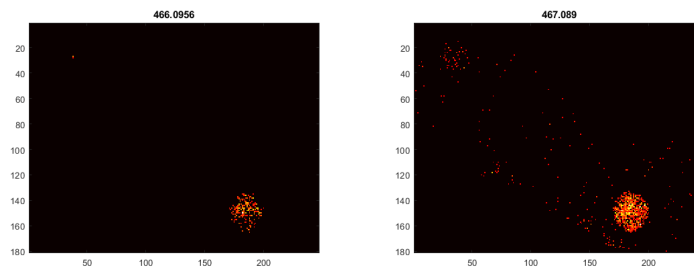

Figure S13: Fragments and isotopes for  $m/z = 465.107$ .

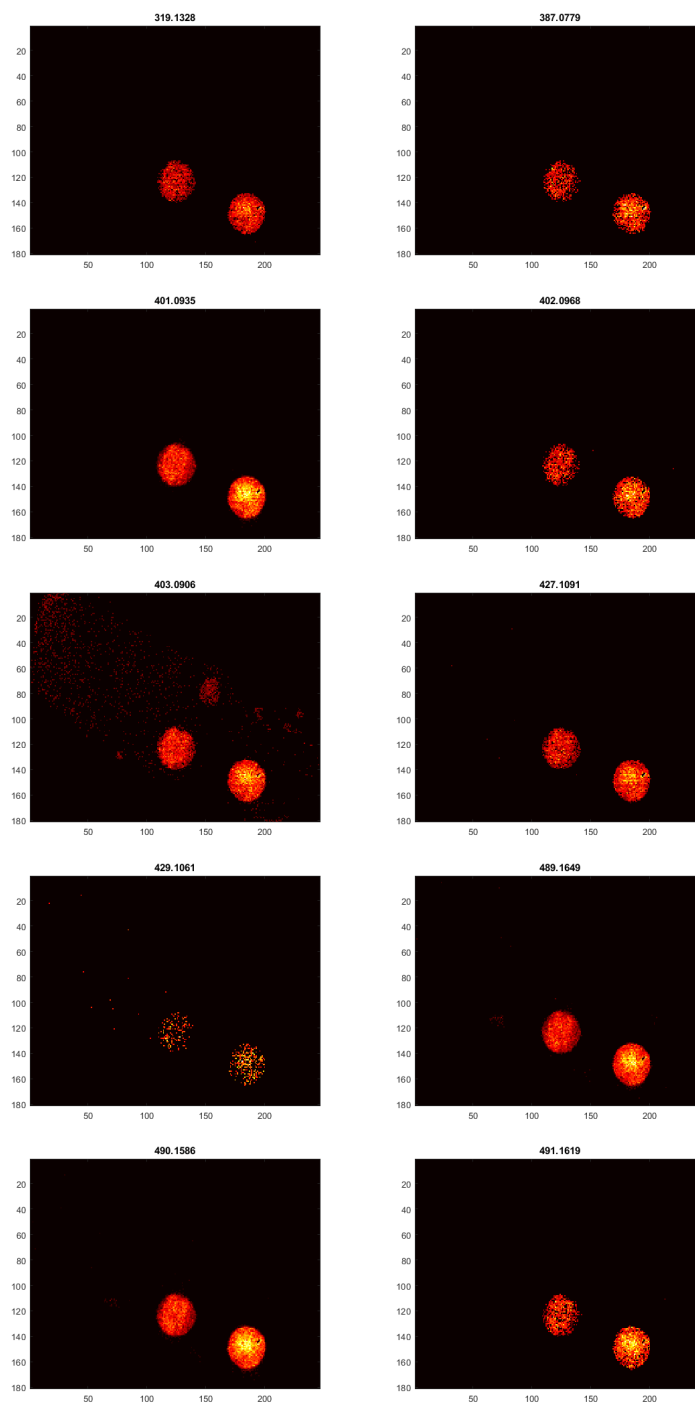

Figure S14: Fragments and isotopes for  $m/z = 488.223$ .

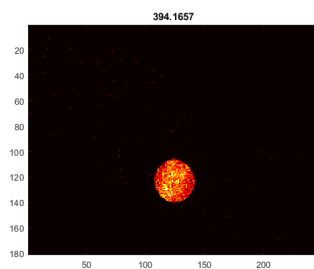

Figure S15: Fragments and isotopes for  $m/z = 494.223$ .

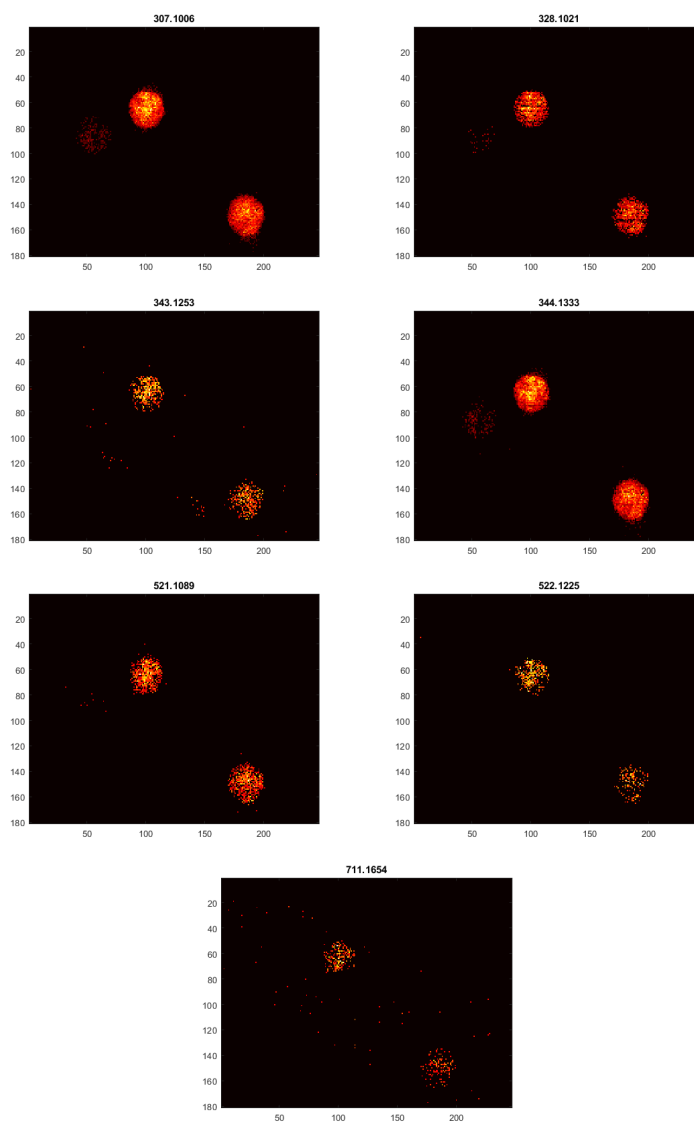

Figure S16: Fragments and isotopes for  $m/z = 520.223$ .
